# Supplementary material for: Integrated transcriptomic and machine learning-driven analysis reveals high-confidence circular RNA biomarkers in Lung Adenocarcinoma
Source: Research Square preprint supplement (doi:10.21203/rs.3.rs-8684357/v1), 2026-02-19
Supplement: Supplementary file 1 [file 9b1549e049961761817dfc6e.docx]

**Highlights**

- Multi-algorithm ML approach prioritized 34 high-confidence biomarker circRNAs
- Top ranked circRNAs show corroboration with prior cancer research.
- Upregulated circRNAs drive metabolism; downregulated ones regulate apoptosis
- Functional analyses link circRNAs to key tumour growth and survival pathways.
