# Supplementary material for: Integrated transcriptomic and machine learning-driven analysis reveals high-confidence circular RNA biomarkers in Lung Adenocarcinoma
Source: Research Square preprint supplement (doi:10.21203/rs.3.rs-8684357/v1), 2026-02-19
Supplement: Supplementary file 2 [file b41b00324d228d9f37416bad.docx]

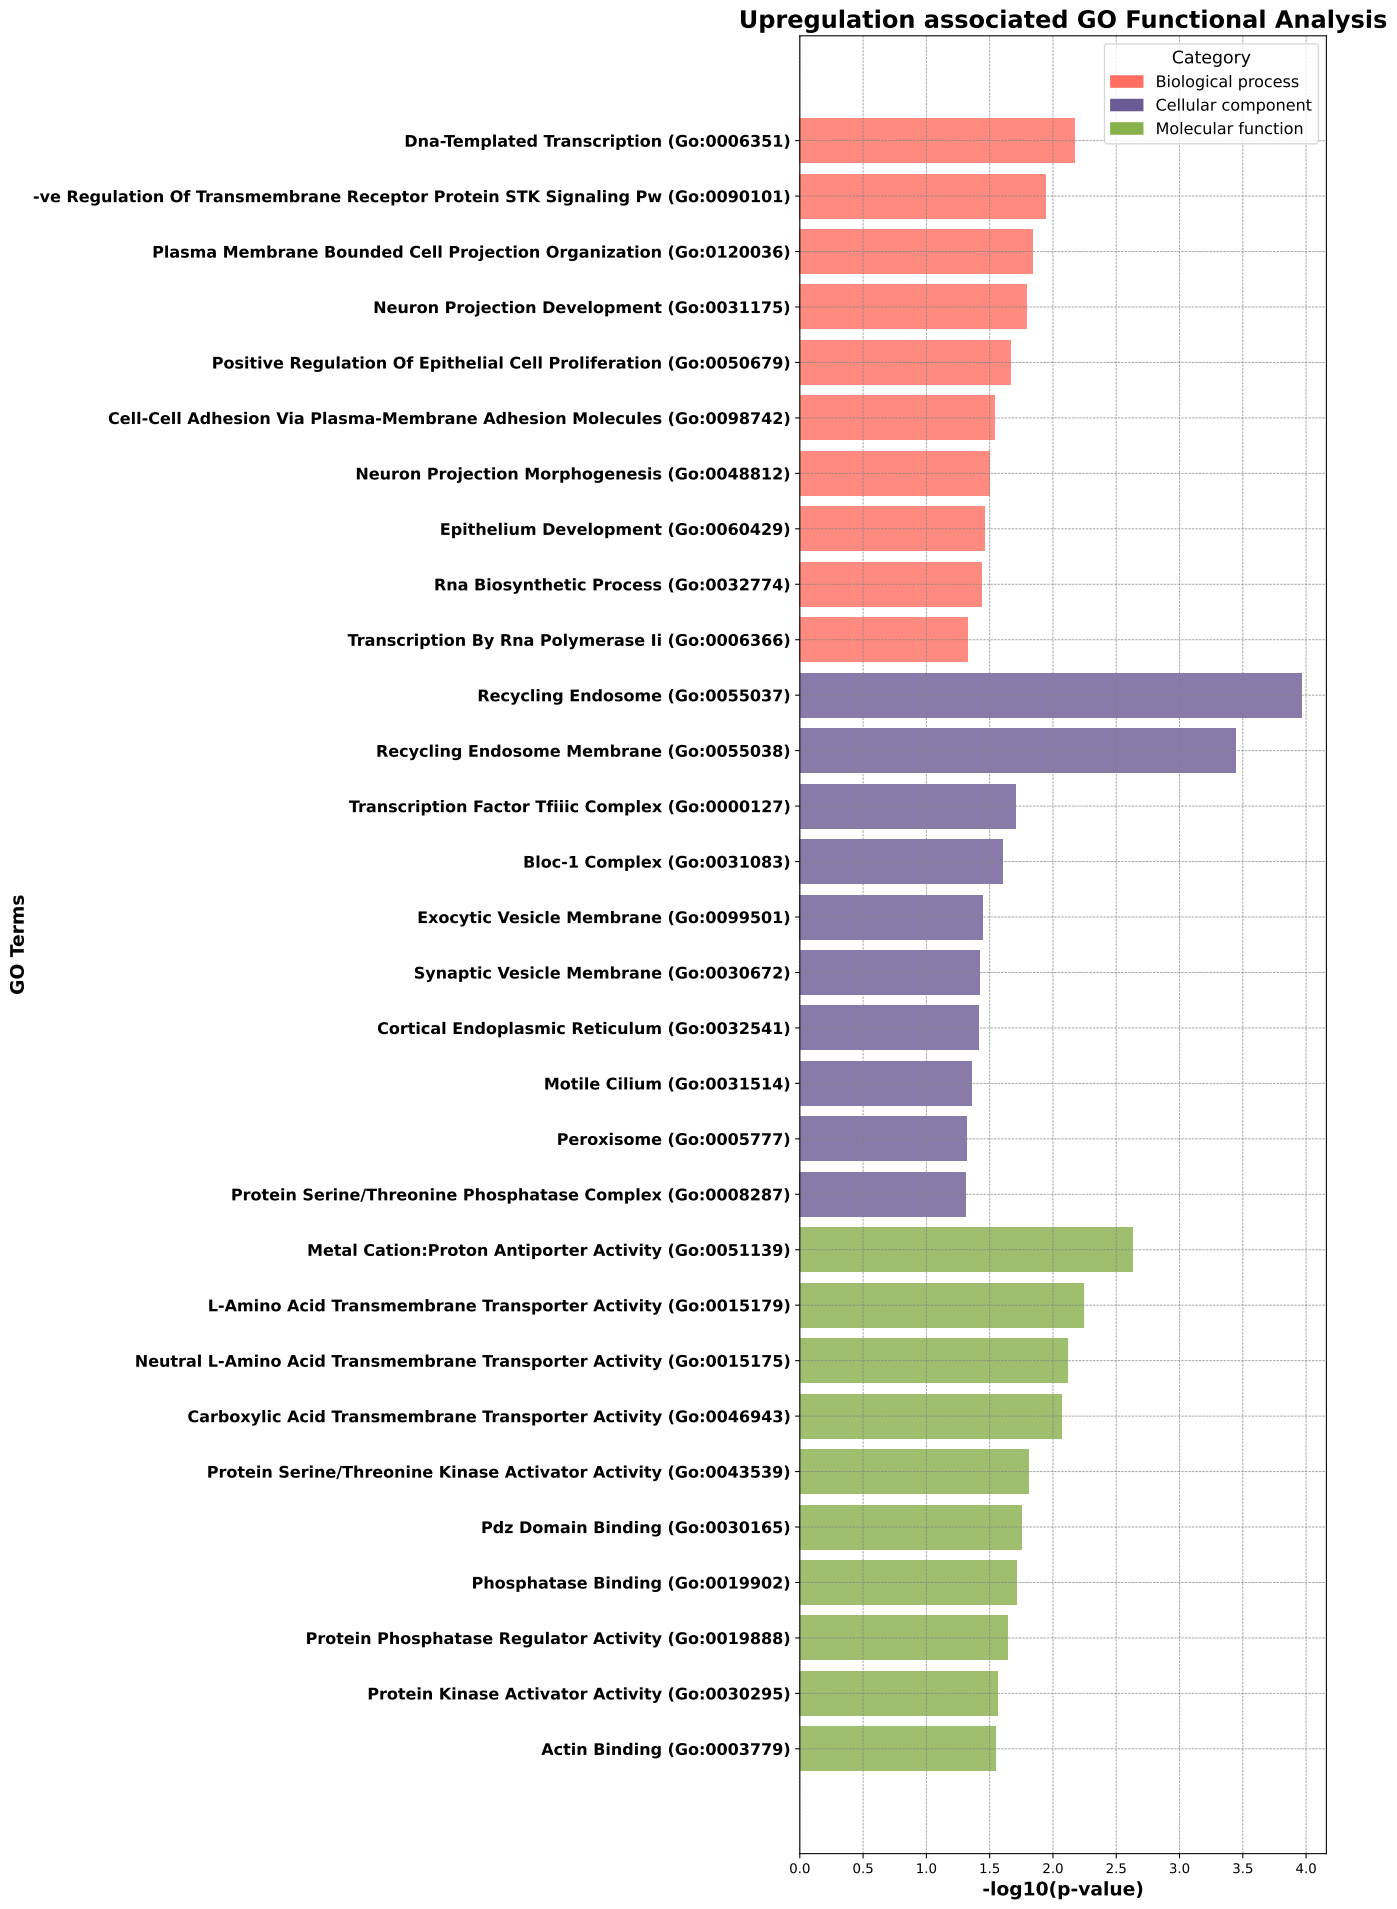


**Supplementary_Fig1:** Gene Ontology functional enrichment analysis of upregulated circRNA target genes. GO terms are categorized into biological processes, cellular components , and molecular functions, as depicted in the graoh above. Bar length represents statistical significance (-log10 p-value). Top enriched terms include transcription regulation, neuron projection development, recycling endosome components, and transporter activities.


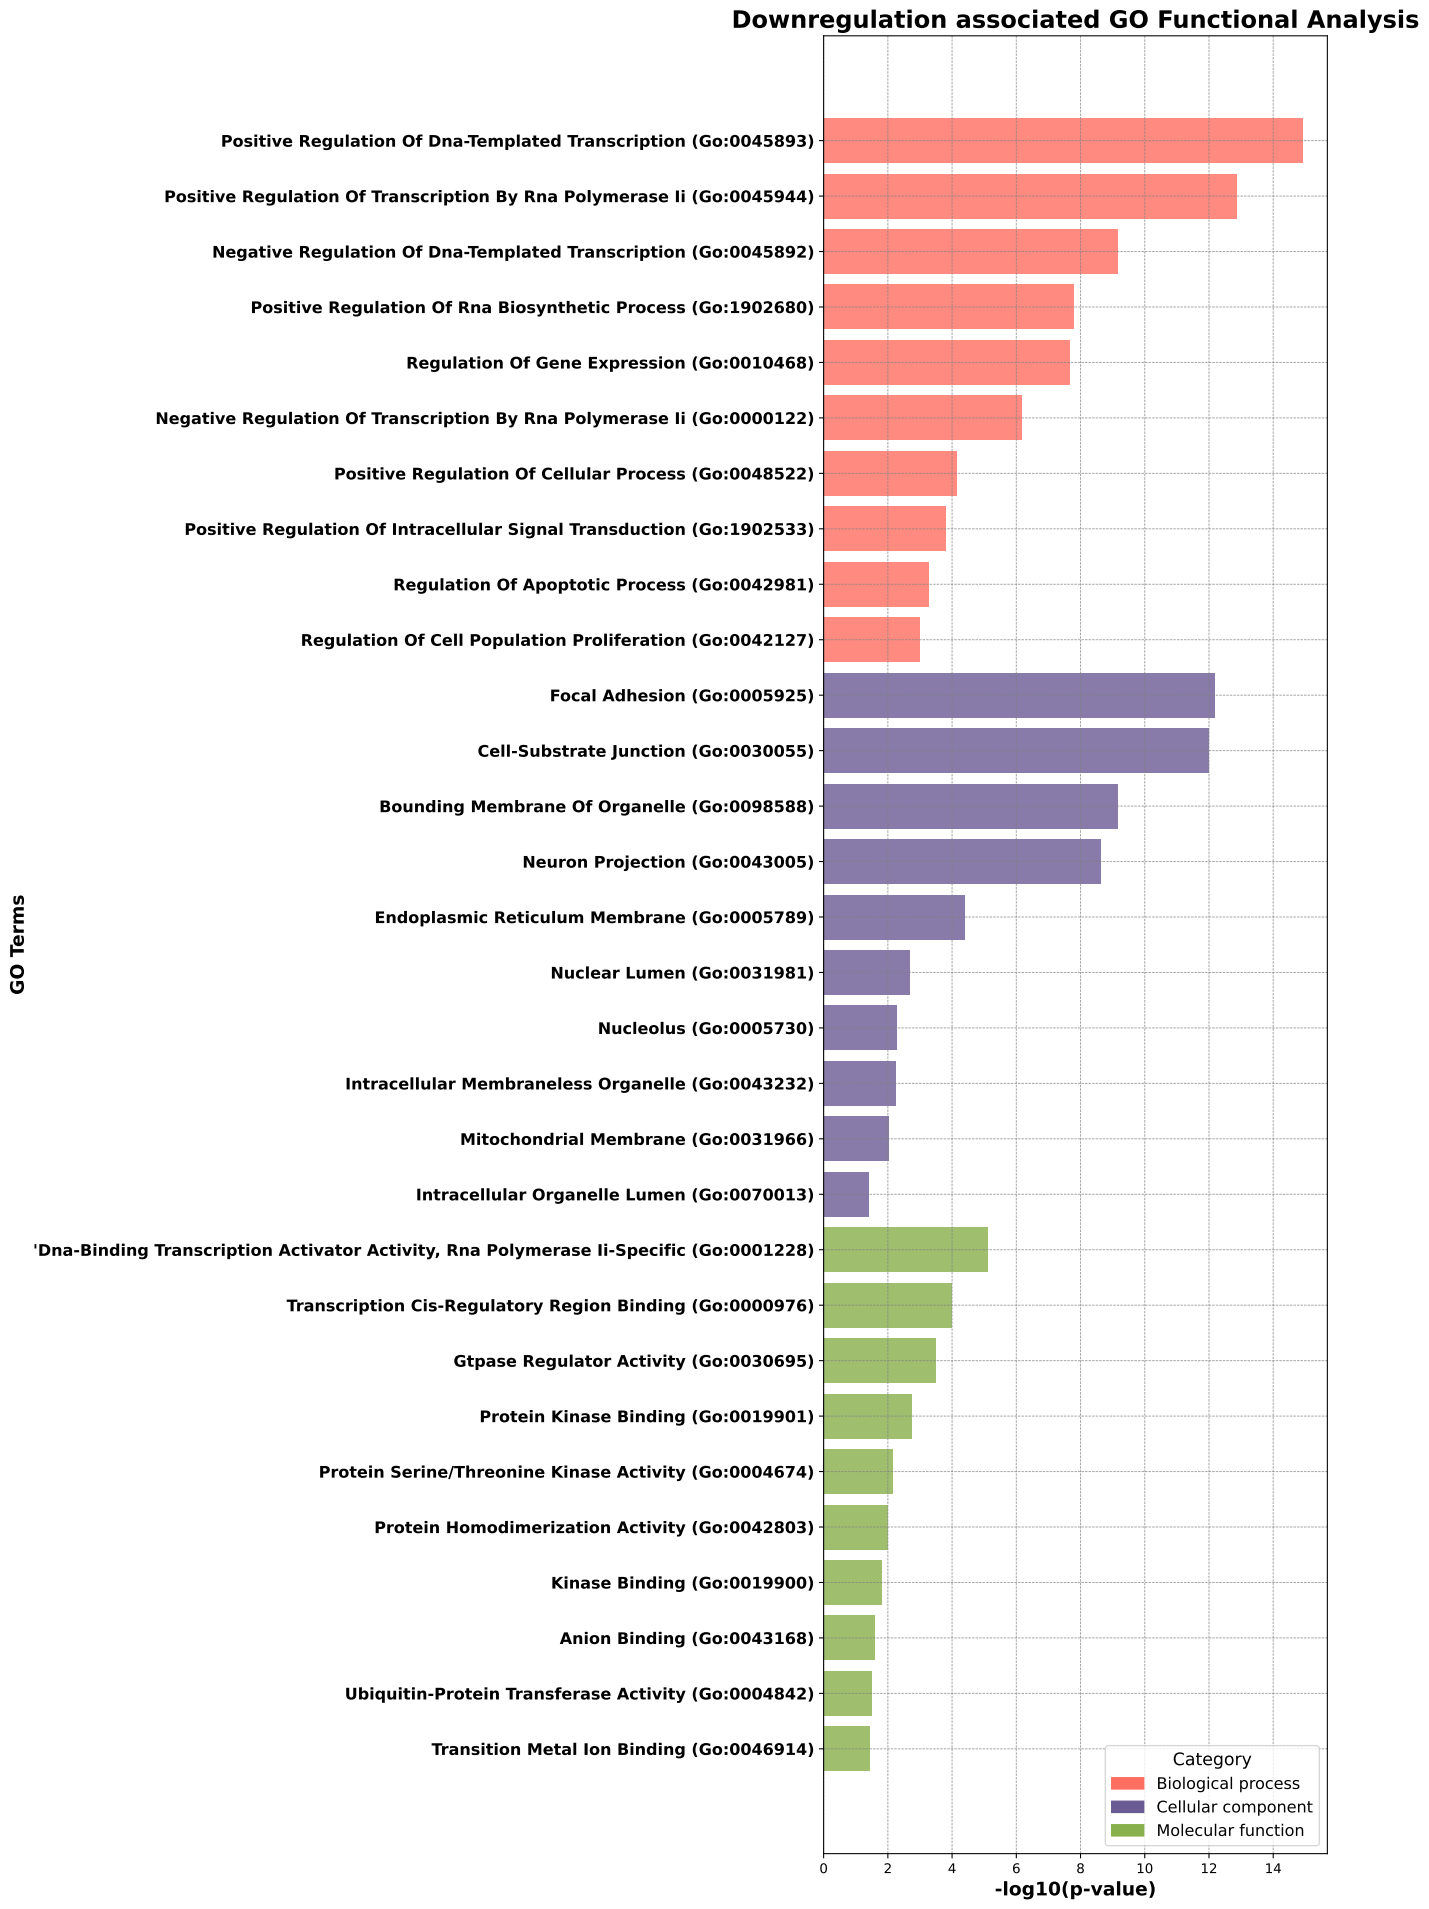


**Supplementary_Fig2:** Gene Ontology functional enrichment analysis of downregulated circRNA target genes. GO terms are categorized into biological processes, cellular components , and molecular functions, as depicted in the graoh above. Bar length represents statistical significance (-log10 p-value). Top enriched terms include transcription regulation (both positive and negative), apoptosis regulation, focal adhesion components, and DNA-binding transcription activator activity.
